# Supplementary material for: 2D Salphen-based heteropore covalent organic frameworks for highly efficient electrocatalytic water oxidation
Source: Royal Society of Chemistry journal article supplement (doi:10.1039/d1cc04369b), 2021-01-01
Supplement: d1cc04369b1.pdf [file d1cc04369b1.pdf]

Supporting Information for

**2D Salphen-based heteropore covalent organic frameworks for highly efficient electrocatalytic water oxidation**

Lin-Lin Wang,<sup>a</sup> Wen-Da Zhang,<sup>a</sup> Tao Li,<sup>a</sup> Xiaodong Yan,<sup>a</sup> Jie Gao,<sup>a</sup> Yu-Xuan Chen,<sup>a</sup> Ya-Xiang Shi,<sup>a</sup> Zhi-Guo Gu<sup>\*a,b</sup>

<sup>a</sup> Key Laboratory of Synthetic and Biological Colloids, Ministry of Education, School of Chemical and Material Engineering, Jiangnan University, Wuxi 214122, China.

<sup>b</sup> International Joint Research Center for Photoresponsive Molecules and Materials, School of Chemical and Material Engineering, Jiangnan University, Wuxi 214122, China.

E-mail: zhiguogu@jiangnan.edu.cn

## 1. General Information

All chemicals were reagent grade, purchased from commercial sources and used without further purification. Fourier transform infrared (FT-IR) measurements were performed on a Thermo Nicolet iS10 spectrometer in the range of 500-4000  $\text{cm}^{-1}$ .  $^{13}\text{C}$  cross-polarization with magic angle-spinning (CP-MAS) solid-state nuclear magnetic resonance (NMR) spectra were recorded on a Bruker ARX 300 MHz spectrometer. X-ray photoelectron spectroscopy (XPS) analysis was measured by a Kratos Axis Supra instrument using a monochromatized Al K $\alpha$  radiation as X-ray source. Thermogravimetric analyses (TGA) were obtained using a Mettler Toledo TGA/DSC1/1100SF analyser in the temperature range of 30 to 800 °C under flowing  $\text{N}_2$ . The Brunauer-Emmett-Teller (BET) surface area was evaluated by  $\text{N}_2$  sorption isotherms collected at 77 K using a Micromeritics ASAP2020 surface area and pore size analyser. Pore size distribution was determined by nonlocal density functional theory mode in the instrument software package. Scanning electron microscopy (SEM) images were obtained on a Hitachi S-4800. Transmission electron microscopy (TEM) images were obtained on a JEOL JEM-2100. HRTEM images and EDS mapping were carried out on a Tecnai G2 F30 transmission electron microscopy at an acceleration voltage of 300 kV. Powder X-ray diffraction (PXRD) patterns were collected on a D8 Advance X-ray diffractometer (Bruker AXS Germany) with Cu K $\alpha$  radiation at 40 kV 200 mA with scanning rate of  $2^\circ \cdot \text{min}^{-1}$  ( $2\theta$ ) at room temperature.

## 2. Electrochemical performance experiments

The electrochemical performances of the samples were evaluated on an electrochemical working station (CHI760E). Cyclic voltammetry (CV) and electrochemical impedance spectroscopy (EIS) measurements were conducted on in a three-electrode setup, using a Pt plate ( $1 \text{ cm}^2$ ) as the counter electrode and Hg/HgO electrode as the reference electrode. The working electrode was prepared as follows. Typically, 5 mg of the electrocatalyst powder was dispersed in 0.96 mL of 1:1 (V/V) deionized water/EtOH mix solvent with 40  $\mu\text{L}$  of Nafion solution. The mixture was sonicated for about 1 h to form a homogeneous catalyst ink. 160  $\mu\text{L}$  of the catalyst ink was coated on the Ni foam and dried in oven for 12 h. The mass loading on each electrode is about  $0.80 \text{ mg cm}^{-2}$ . All the electrochemical measurements were recorded in 1 M KOH aqueous electrolyte. EIS spectra were collected at 1.52 V versus RHE in the frequency range from 0.01 to  $10^5$  Hz with a amplitude of 5 mV. Before collecting the data, the catalyst electrodes were run for 10 cycles for activation. Linear sweep voltammogram (LSV) was obtained at the scan rate of  $10 \text{ mV s}^{-1}$  in 1 M KOH. Tafel slopes were derived from the LSV curves. Chronopotentiometric measurements were conducted for the stability test at a current density of  $10 \text{ mA cm}^{-2}$  for 10 h. The potential was converted according to the equation:  $E_{\text{RHE}} = E_{\text{Hg/HgO}} + 0.098 + 0.059 \times \text{pH} = E_{\text{Hg/HgO}} + 0.924$ . The overpotential was computed as:  $\eta = E_{\text{RHE}} - 1.23 \text{ V}$ .

### 3. Experimental section

#### Synthesis of **Salphen-COF**

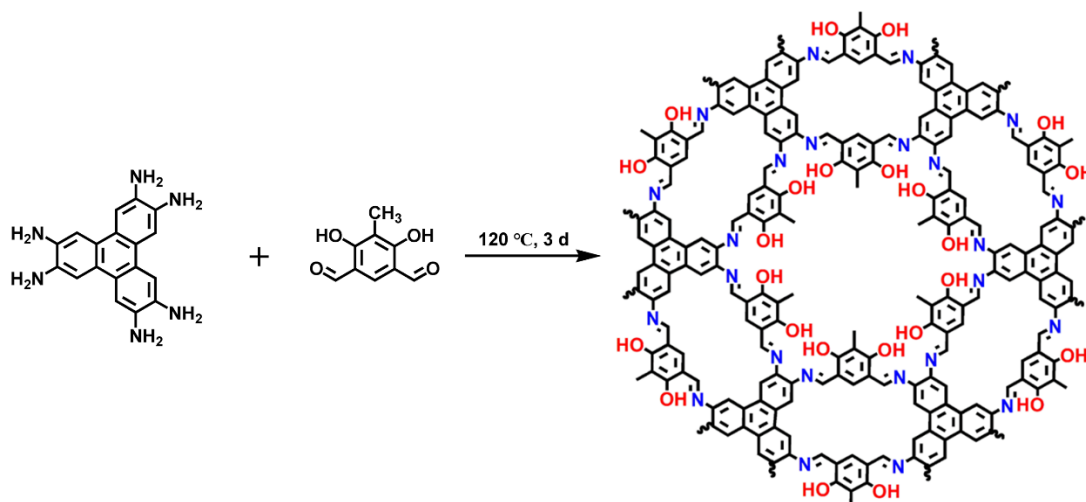

Triethylamine (Et<sub>3</sub>N) (25%, 100  $\mu$ L) was added to a solution of 12.62 mg of HATP·6HCl in 5 mL of water, after sonicating for 2 minutes, centrifuge to collect the precipitate for use. Add 0.286 mL of mesitylene and 1.714 mL of 1,4-dioxane to the above precipitation and transfer to a glass bottle (volume of ca. 10 mL), then add 4,6-Dihydroxy-5-methyl-1,3-diformyl benzene (DMDB) (12.7 mg, 0.105 mmol) to the glass bottle. The resulting solution was sonicated for 10 minutes to obtain a homogenous dispersion, to which 0.2 mL of 6 M aqueous acetic acid (AcOH) was added. The glass bottle was transferred into a 25 mL Teflon-lined stainless steel autoclave. The autoclave was sealed and heated at 120 °C for 3 days and then cooled to room temperature. The formed brown precipitate was collected by filtration and washed with ethanol (3  $\times$  20 mL), DMF (3  $\times$  20 mL) and acetone (3  $\times$  20 mL), soxhlet extracted by THF 24 h, then dried at 120 °C under vacuum for 24 h to give a brown powder with 81% yield. FT-IR (powder):  $\nu_{\max}$  1620, 1510, 1419, 1374, 1316, 1298, 1223, 1160, 1069, 1001, 884, 799, 718 and 655  $\text{cm}^{-1}$ .

## Synthesis of Ni-Salphen-COF

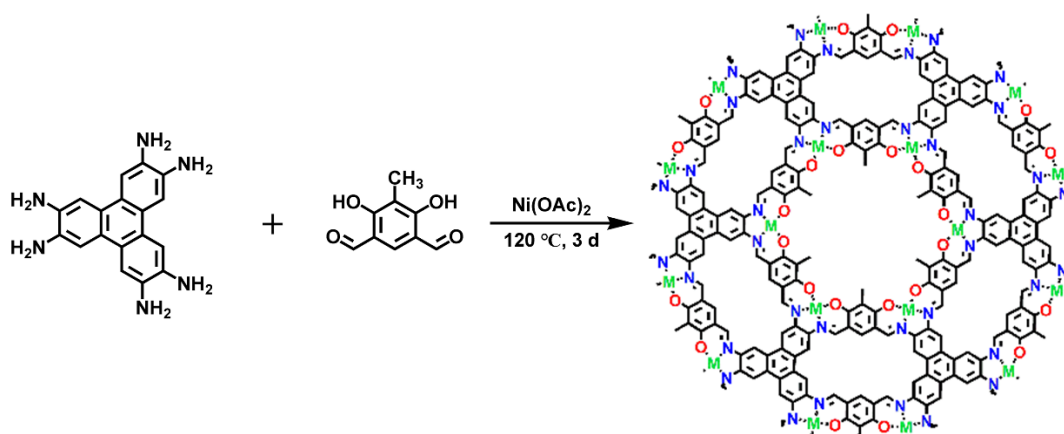

Triethylamine ( $\text{Et}_3\text{N}$ ) (25%, 100  $\mu\text{L}$ ) was added to a solution of 12.62 mg of  $\text{HATP}\cdot 6\text{HCl}$  in 5 mL of water, after sonicating for 2 minutes, centrifuge to collect the precipitate for use. Add 0.286 mL of mesitylene and 1.714 mL of 1,4-dioxane to the above precipitation and transfer to a glass bottle (volume of ca. 10 mL), then add 4,6-Dihydroxy-5-methyl-1,3-diformyl benzene (DMDB) (12.7 mg, 0.105 mmol) and excess  $\text{Ni(OAc)}_2\cdot 4\text{H}_2\text{O}$  (20 mg, 0.080 mmol) to the glass bottle. The resulting solution was sonicated for 10 minutes to obtain a homogenous dispersion, to which 0.2 mL of 6 M aqueous acetic acid ( $\text{AcOH}$ ) was added. The glass bottle was transferred into a 25 mL Teflon-lined stainless steel autoclave. The autoclave was sealed and heated at  $120\text{ }^\circ\text{C}$  for 3 days and then cooled to room temperature. The formed black precipitate was collected by filtration and washed with ethanol ( $3 \times 20\text{ mL}$ ), DMF ( $3 \times 20\text{ mL}$ ) and acetone ( $3 \times 20\text{ mL}$ ), soxhlet extracted by THF 24 h, and then dried at  $120\text{ }^\circ\text{C}$  under vacuum for 24 h to give a reddish brown powder with 75% yield. FT-IR (powder):  $\nu_{\text{max}}$  2921, 1621, 1582, 1523, 1487, 1428, 1379, 1267, 1158, 1114, 1015, 884, 849, 727 and  $664\text{ cm}^{-1}$ .

## Synthesis of NiFe-Salphen-COF

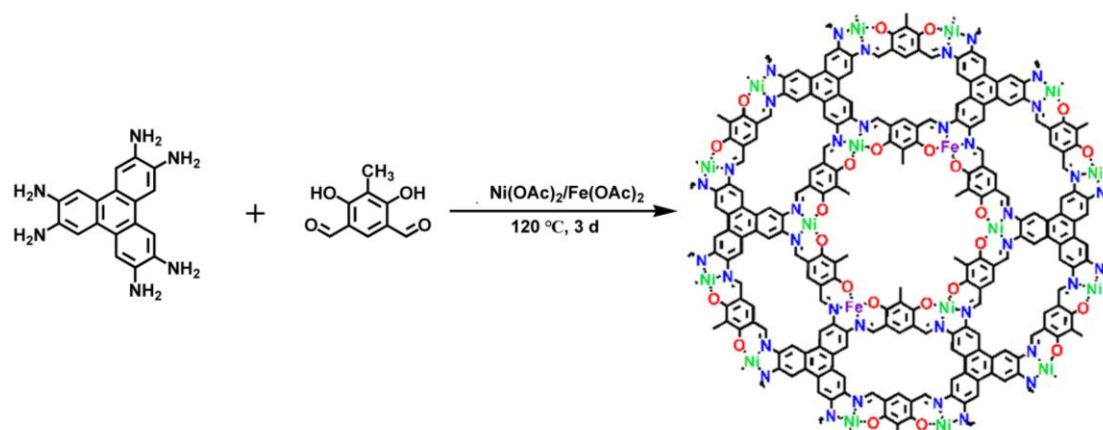

Triethylamine ( $\text{Et}_3\text{N}$ ) (25%, 100  $\mu\text{L}$ ) was added to a solution of 12.62 mg (0.035 mmol) of HATP $\cdot$ 6HCl in 5 mL of water, after sonicating for 2 minutes, centrifuge to collect the precipitate for use. Add 0.286 mL of mesitylene and 1.714 mL of 1,4-dioxane to the above precipitation and transfer to a glass bottle (volume of ca. 10 mL), then add 4,6-Dihydroxy-5-methyl-1,3-diformyl benzene (DMDB) (12.7 mg, 0.105 mmol) and  $\text{Ni}(\text{OAc})_2\cdot 4\text{H}_2\text{O}$  (18 mg, 0.072 mmol) and  $\text{Fe}(\text{OAc})_2$  (2 mg, 0.0172 mmol) to the glass bottle. The resulting solution was sonicated for 10 minutes to obtain a homogenous dispersion, to which 0.2 mL of 6 M aqueous acetic acid ( $\text{AcOH}$ ) was added. The glass bottle was transferred into a 25 mL Teflon-lined stainless steel autoclave. The autoclave was sealed and heated at 120  $^\circ\text{C}$  for 3 days and then cooled to room temperature. The formed black precipitate was collected by filtration and washed with ethanol ( $3 \times 20$  mL), DMF ( $3 \times 20$  mL) and acetone ( $3 \times 20$  mL), soxhlet extracted by THF 24 h, then dried at 120  $^\circ\text{C}$  under vacuum for 24 h to give a reddish brown powder with 84% yield. FT-IR (powder):  $\nu_{\text{max}}$  2921, 1620, 1577, 1523, 1483, 1433, 1388, 1267, 1164, 1100, 886, 851, 727 and 662  $\text{cm}^{-1}$ .

Note that we have prepared a series of NiFe-Salphen-COFs with different Ni/Fe ratios. The crystallinity and OER performance of the other NiFe-Salphen-COFs is not as good as those of NiFe-Salphen-COF with a Ni/Fe ratio of 4.2.

#### 4. Characterization

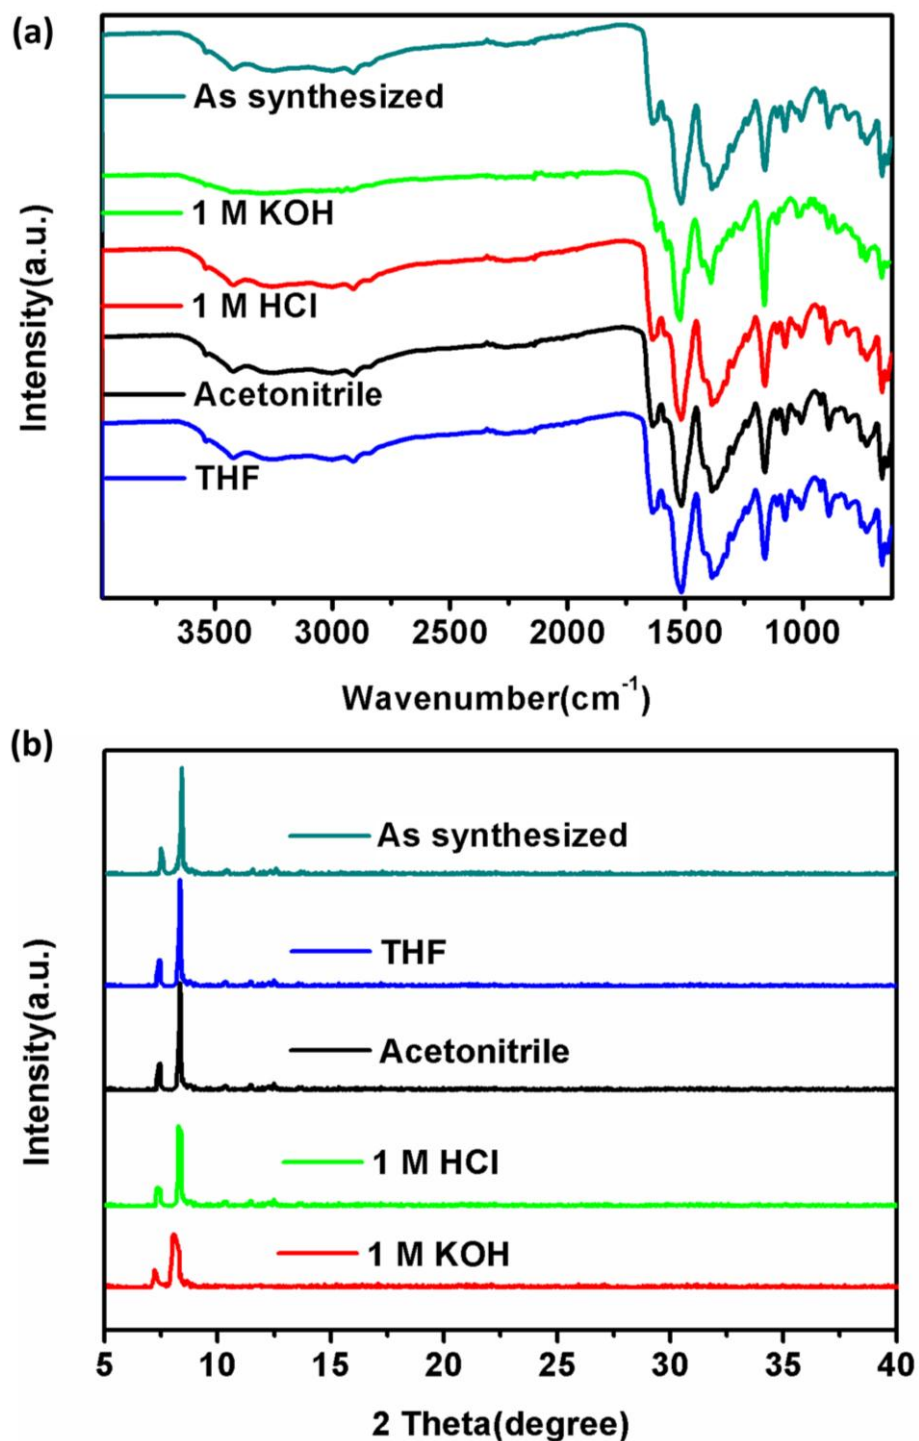

**Fig. S1** (a) The FT-IR spectra and (b) PXRD patterns of **Salphen-COF** after treated in 1 M HCl, 1 M KOH and organic solvents.

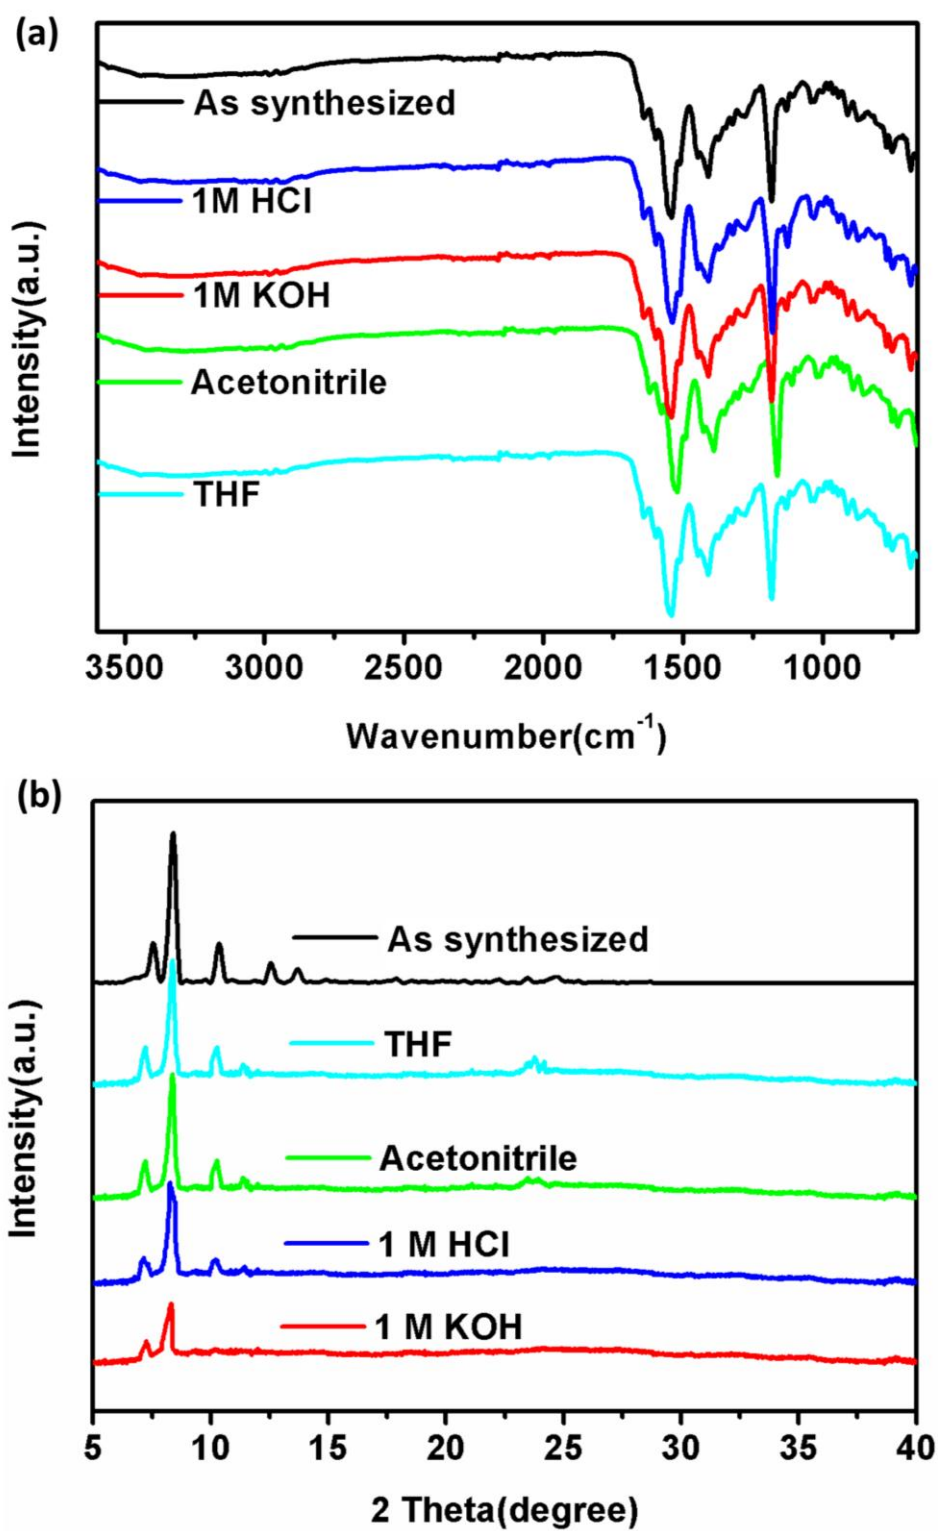

**Fig. S2** (a) FT-IR spectra and (b) PXRD patterns of Ni-Salphen-COF after treated in 1 M HCl, 1 M KOH and organic solvents for 3 days.



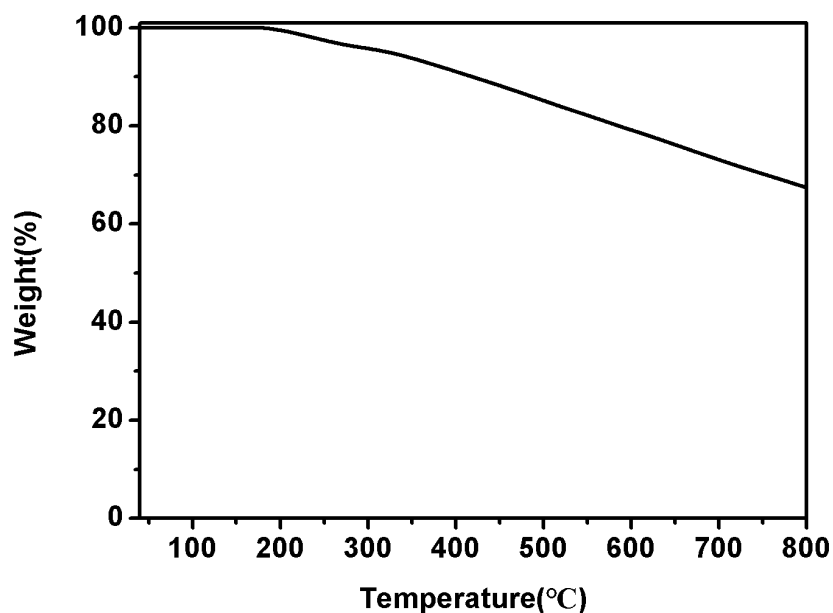

**Fig. S3** Thermogravimetric analysis (TGA) curve of **Salphen-COF**.

**Salphen-COF** exhibited no discernible weight loss from 0 to 272 °C, and then started to decompose. At 800 °C, there was still 60% of weight residual. These indicate its excellent thermal stability.

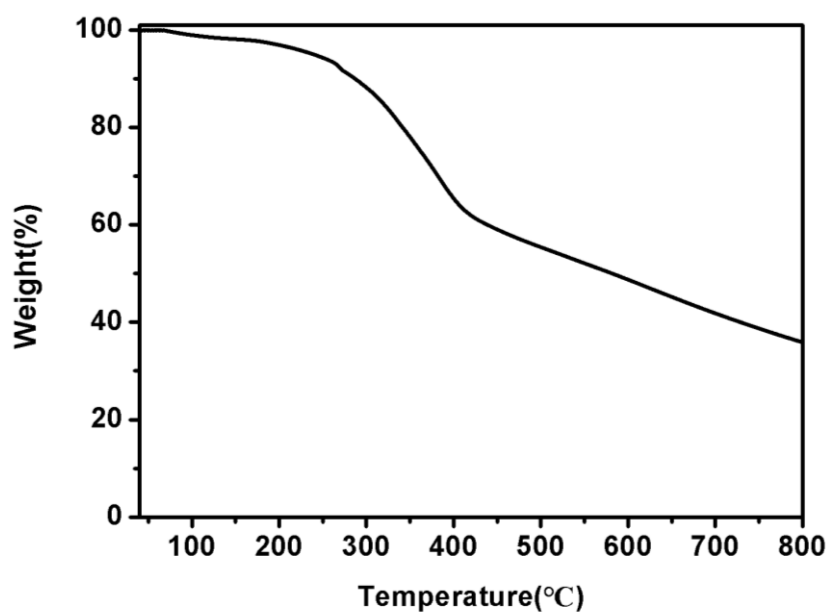

**Fig. S4** Thermogravimetric analysis (TGA) curve of **Ni-Salphen-COF**.

**Ni-Salphen-COF** exhibited no discernible weight loss from 0 to 260 °C, and then started to decompose. At 800 °C, there was still 38% of weight residual. These indicate its high thermal stability.

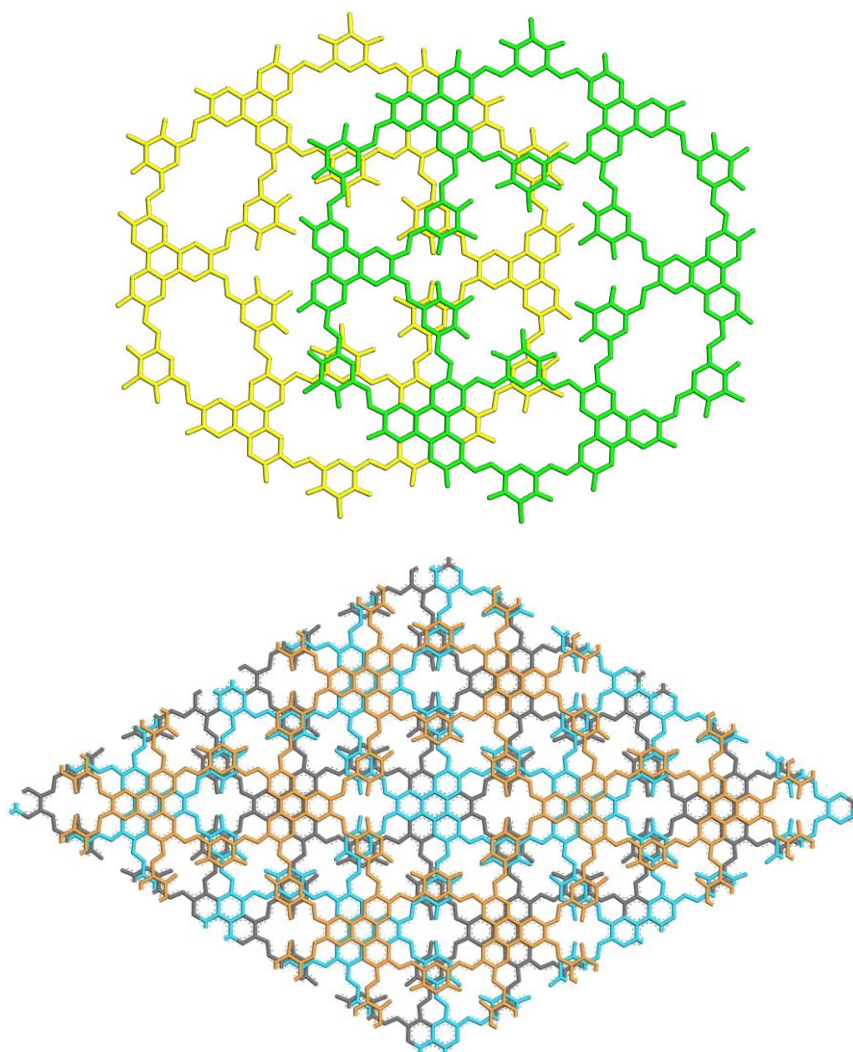

**Fig. S5** Staggered AB stacking (top) and ABC stacking (down) of **Salphen-COF**.

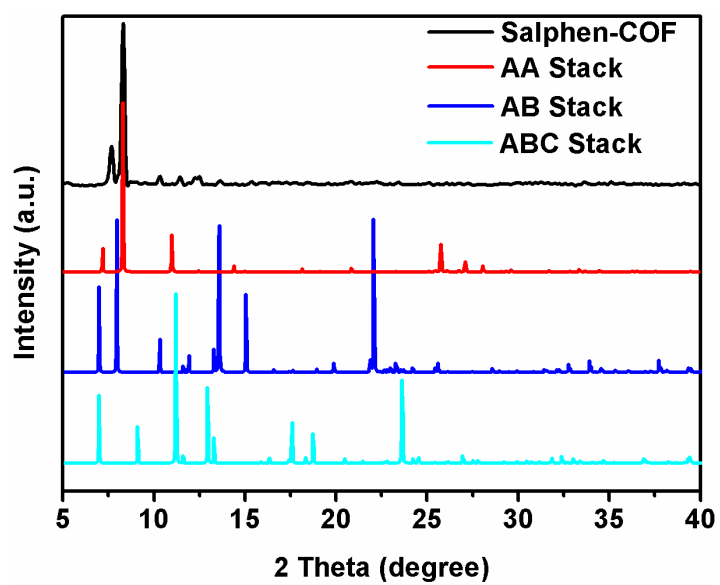

**Fig. S6** Powder X-ray diffraction (PXRD) patterns of **Salphen-COF** (AA stacking, AB stacking and ABC stacking).

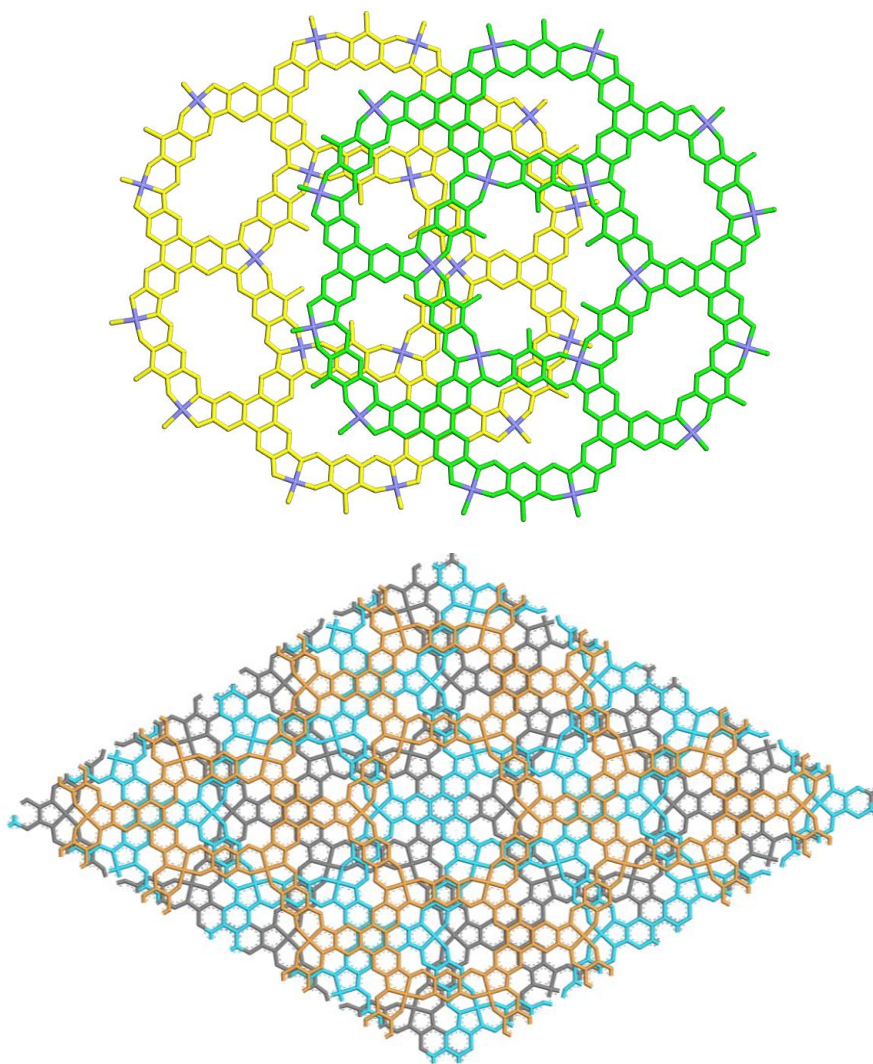

**Fig. S7** Staggered AB stacking (top) and ABC stacking (down) of Ni-Salphen-COF

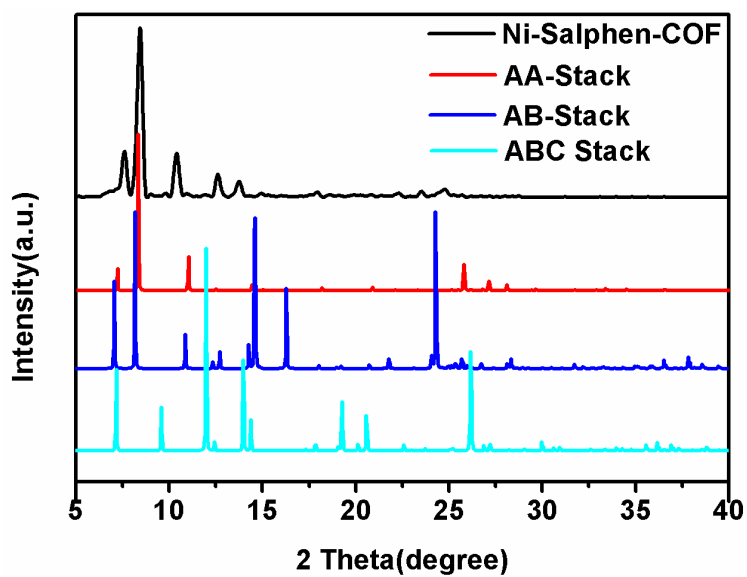

**Fig. S8** Powder X-ray diffraction (PXRD) patterns of Ni-Salphen-COF (AA stacking, AB stacking and ABC stacking).

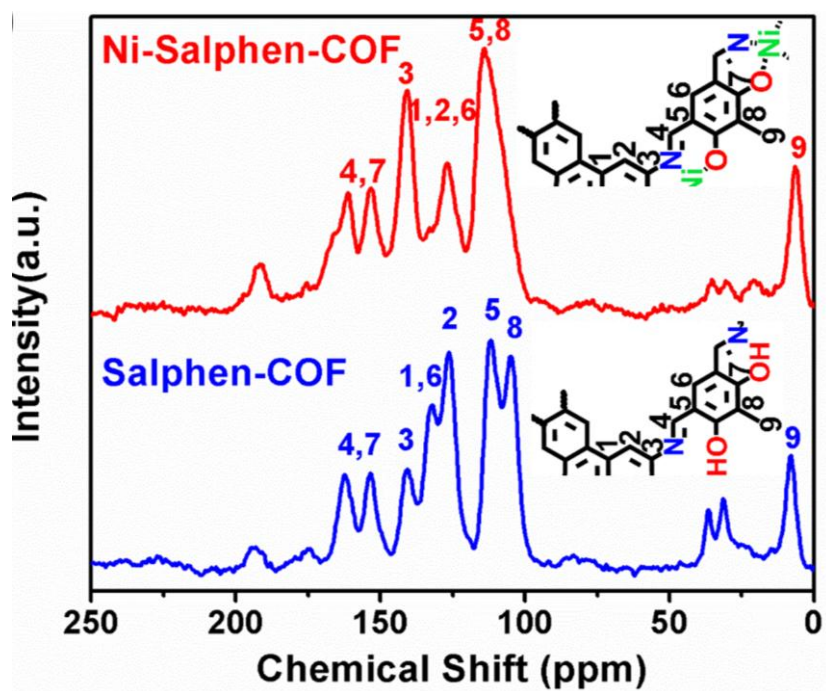

**Fig. S9** Solid-state  $^{13}\text{C}$  CP-MAS NMR spectrum of **Salphen-COF** and **Ni-Salphen-COF**.

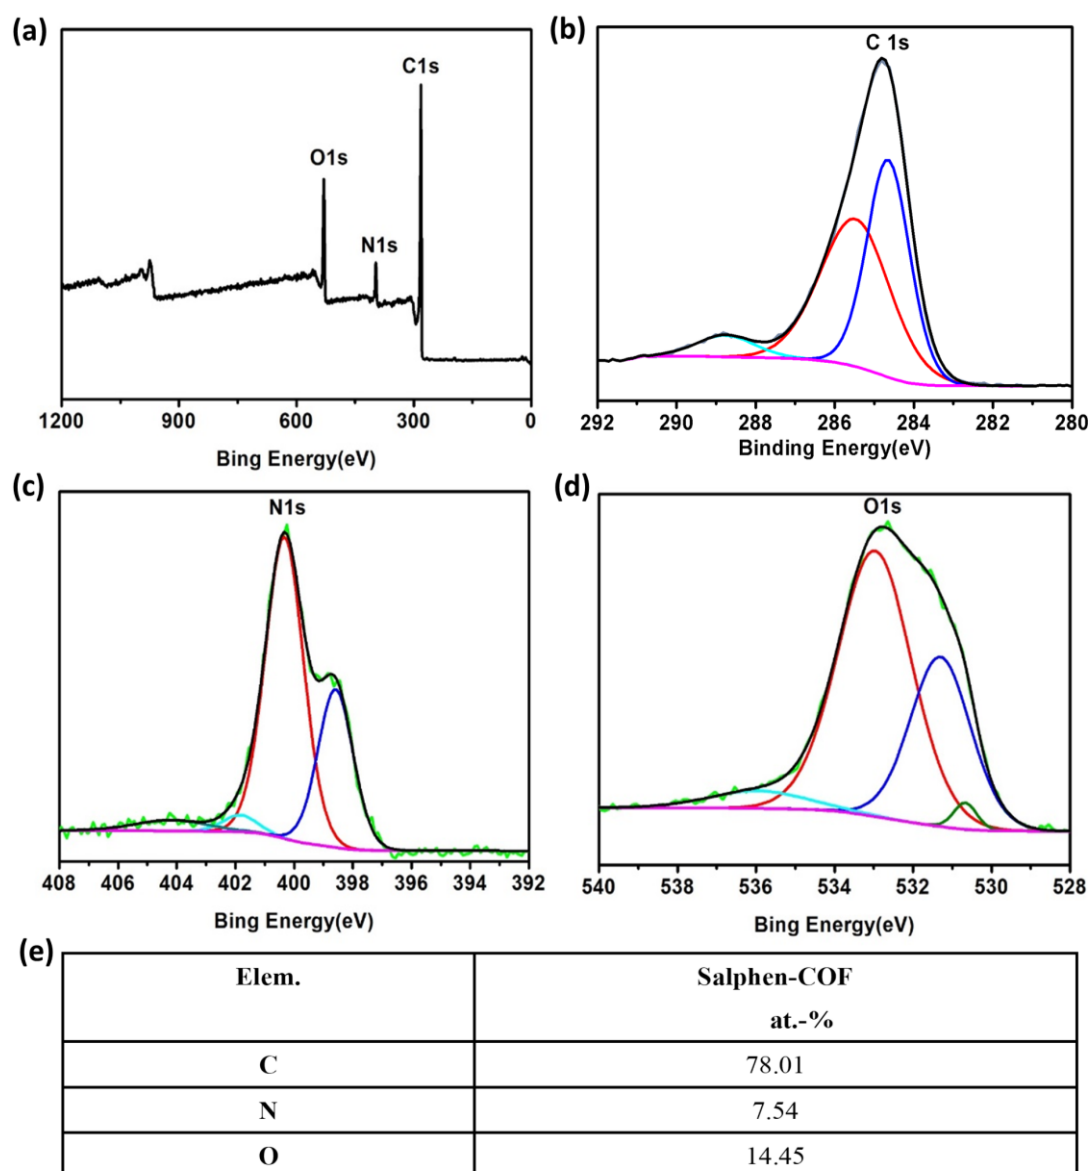

at.-%: atomic ratio in percentage.

**Fig. S10** XPS spectra of **Salphen-COF**. (a) Survey, (b) C 1s, (c) N 1s, (d) O 1s, (e) The elemental composition according to the XPS analysis.

The XPS survey of **Salphen-COF** confirms the presence of C, N and O. The signals at 401 and 533 eV correspond to N 1s and O 1s, respectively.

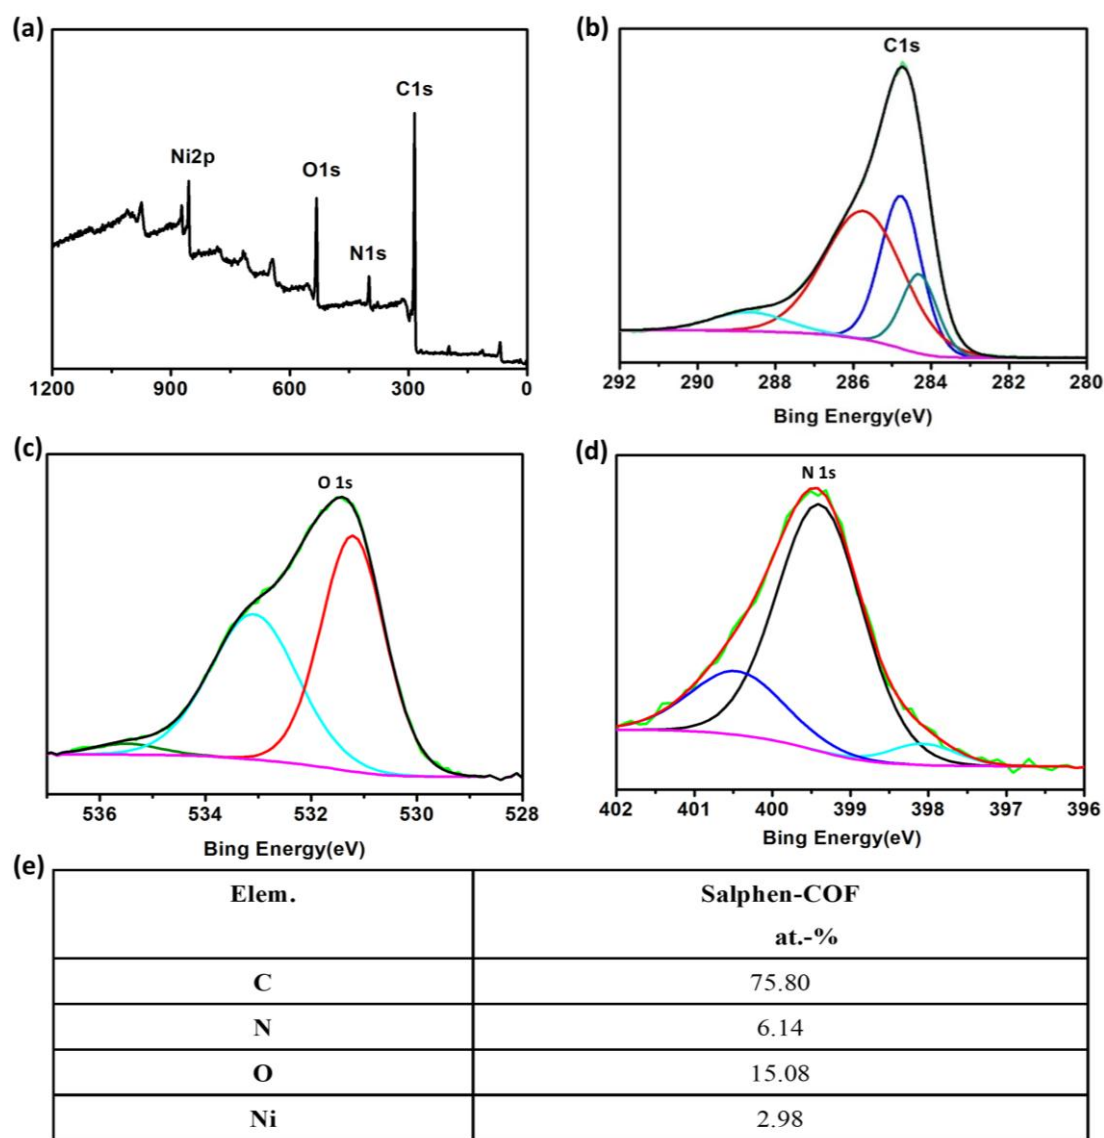

at.-%: atomic ratio in percentage.

**Fig. S11** (a) Survey, (b) C 1s, (c) O 1s and (d) N 1s spectra of **Ni-Salphen-COF**. (e) The elemental composition according to the XPS analysis.

The XPS survey of **Ni-Salphen-COF** confirms the presence of C, N, O and Ni. The signals at 399 and 534 eV correspond to N 1s and O 1s, respectively.

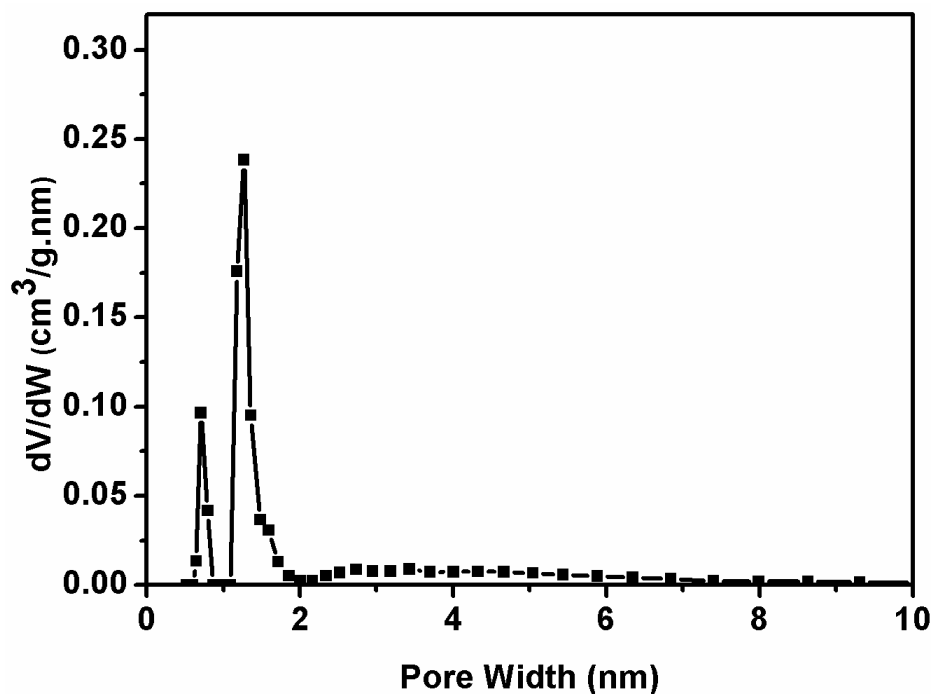

Fig. S12 Pore size distribution of Salphen-COF.

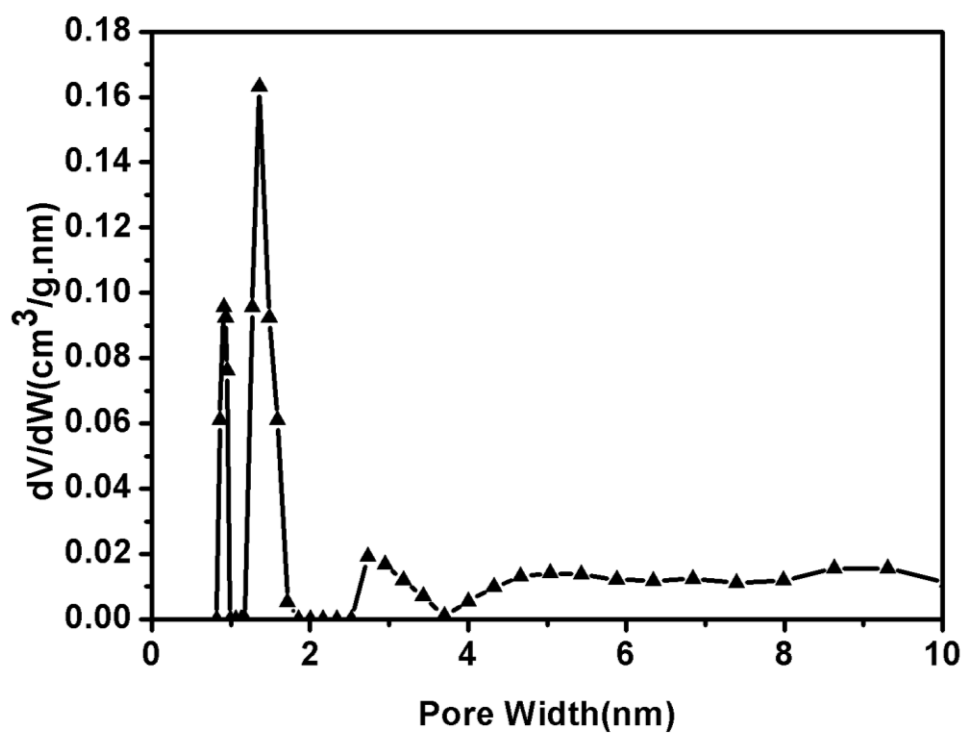

Fig. S13 Pore size distribution of Ni-Salphen-COF.

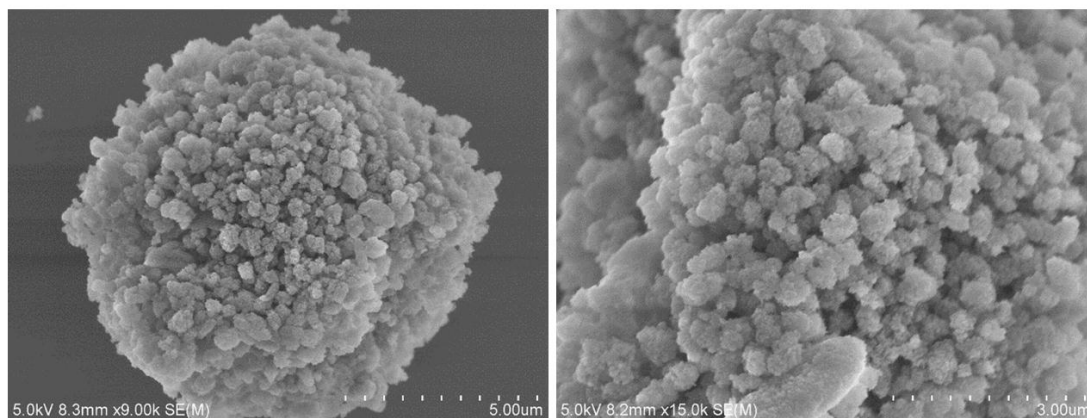

**Fig. S14** SEM images of **Salphen-COF**.

SEM images show that **Salphen-COF** has a spherical shape composed of many nanoparticles.

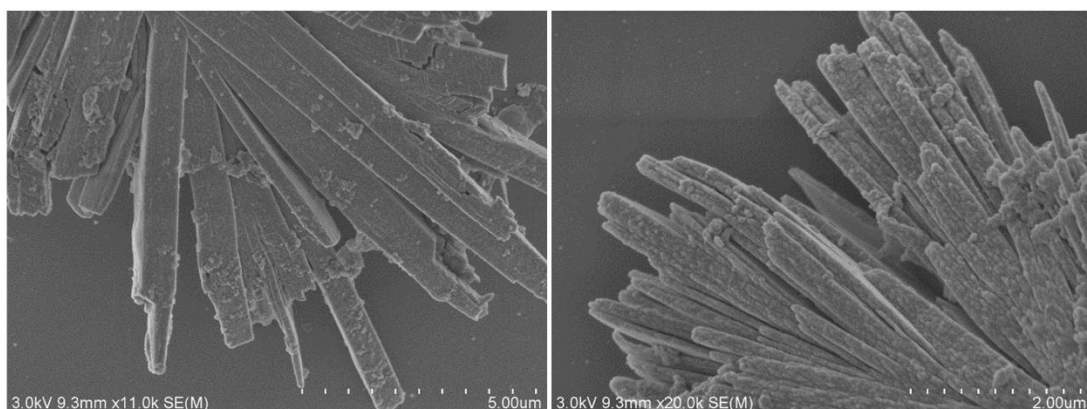

**Fig. S15** SEM images of **Ni-Salphen-COF**.

**Ni-Salphen-COF** has a rod-like morphology likely comprised of nanosheets.

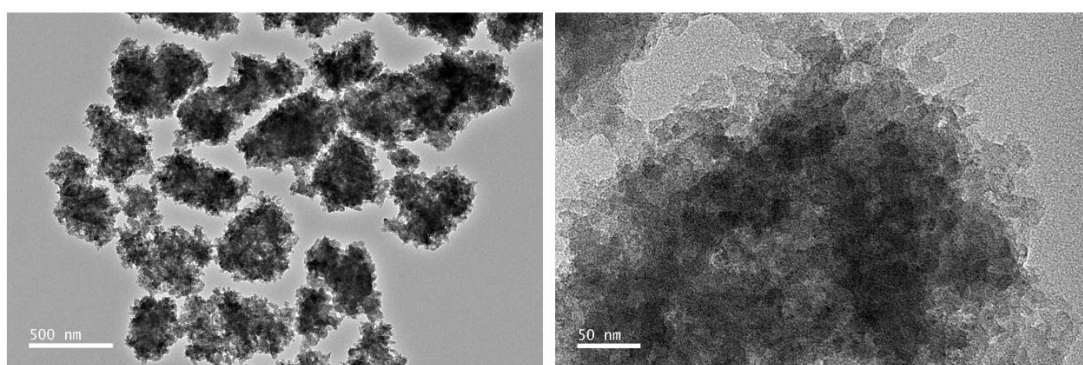

**Fig. S16** TEM images of **Salphen-COF**.



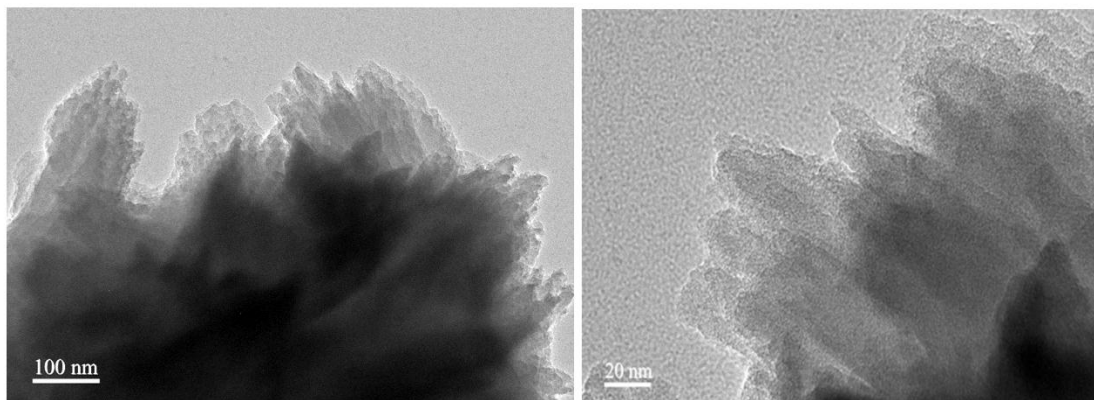

**Fig. S17** TEM images of Ni-Salphen-COF.

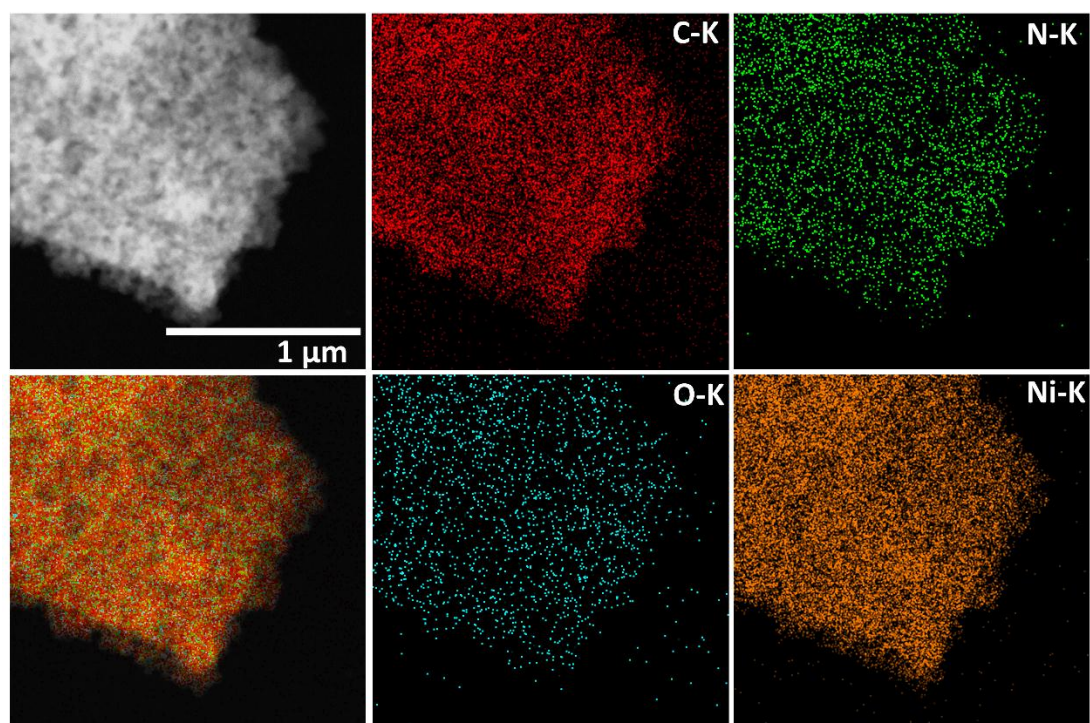

**Fig. S18** Mapping of Ni-Salphen-COF.

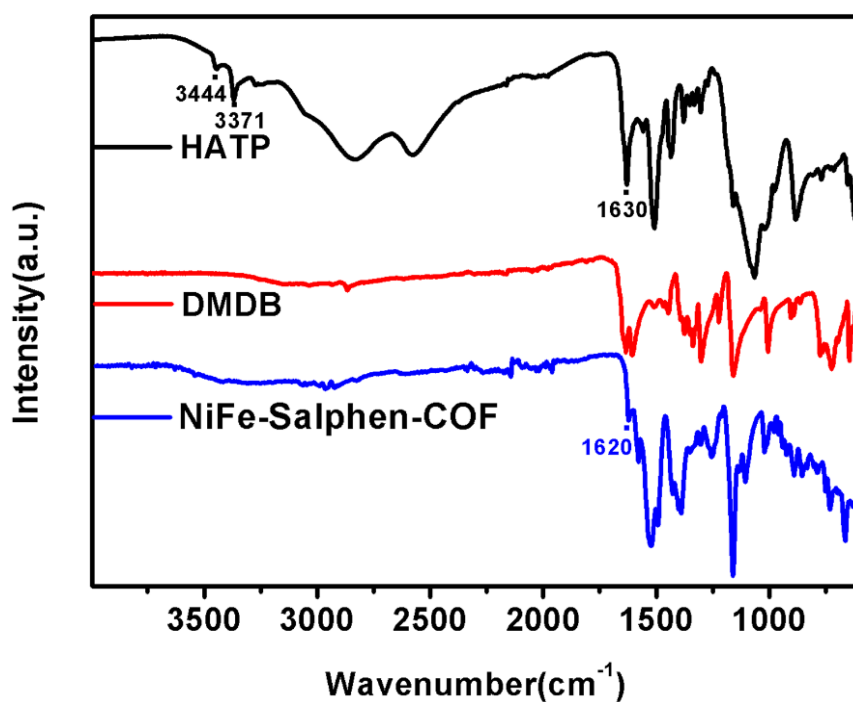

**Fig. S19** FT-IR spectra of HATP, DMDB, and NiFe-Salphen-COF.

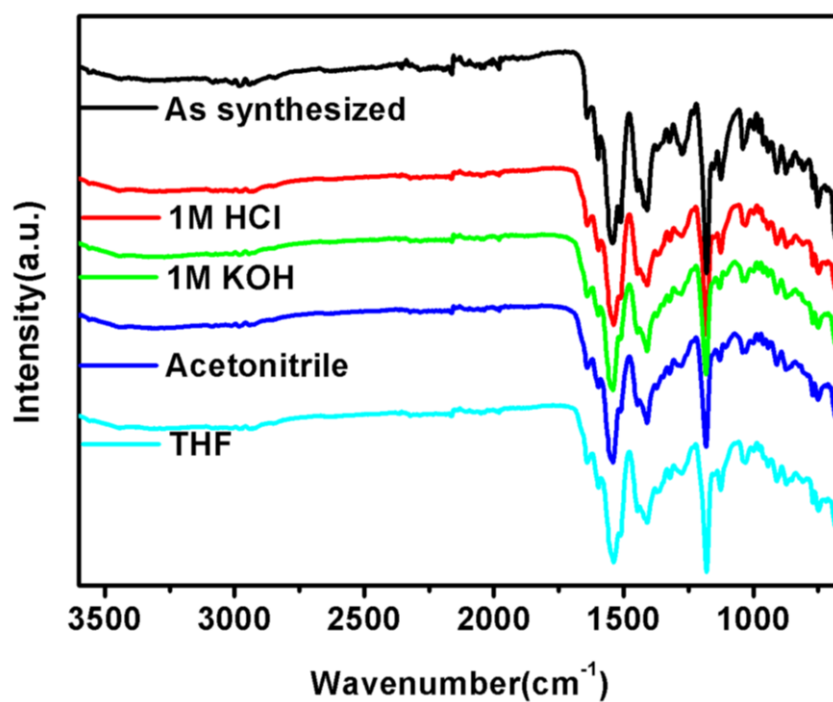

**Fig. S20** FT-IR spectra of NiFe-Salphen-COF after treated in 1 M HCl, 1 M KOH and organic solvents for 3 days.

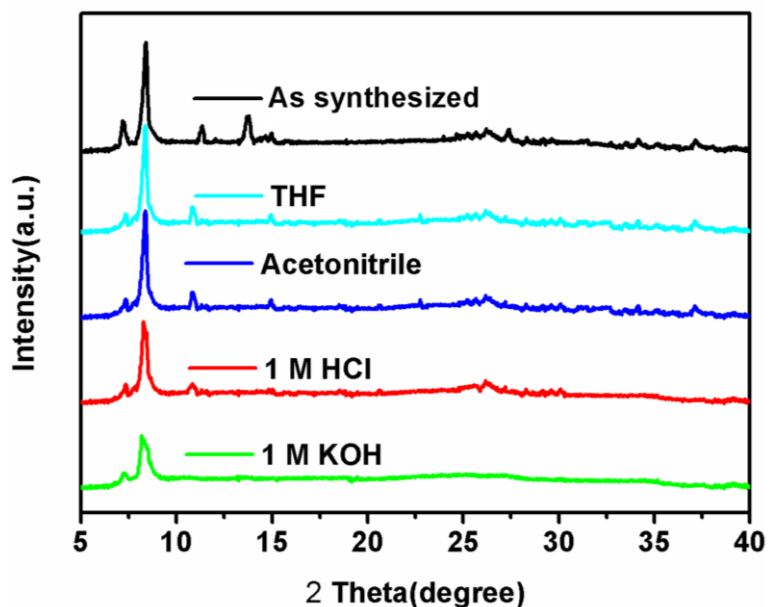

**Fig. S21** PXR D patterns of NiFe-Salphen-COF after treated in 1 M HCl, 1 M KOH and organic solvents for 3 days.

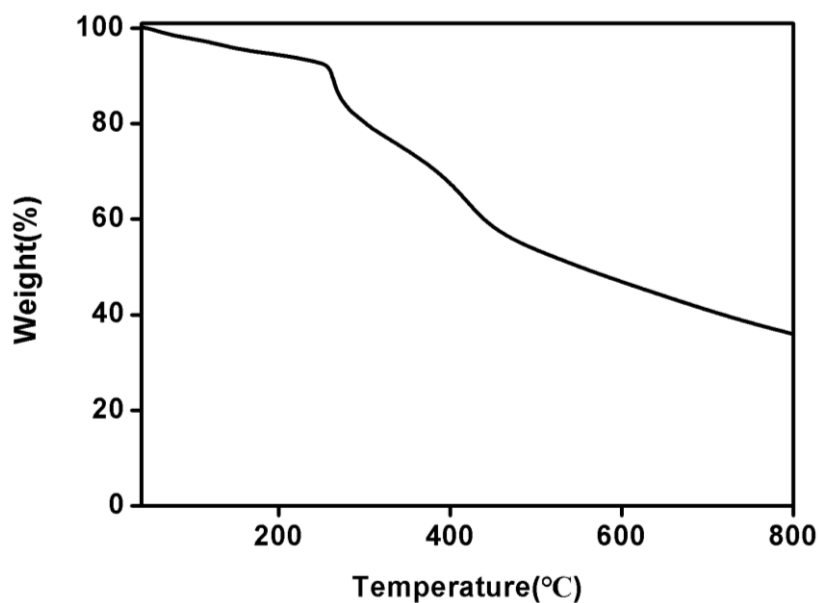

**Fig. S22** Thermogravimetric analysis (TGA) curve of NiFe-Salphen-COF.

NiFe-Salphen-COF exhibited no discernible weight loss from 0 to 240 °C, and then started to decompose. At 800 °C, there was still 41% of weight residual. These indicate its good thermal stability.

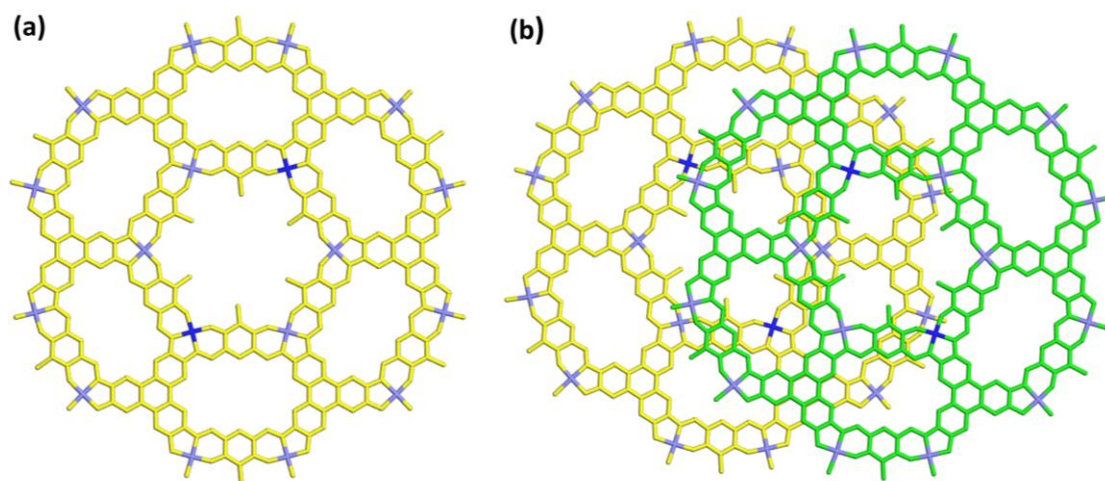

**Fig. S23** (a) Eclipsed stacking AA model of NiFe-Salphen-COF (Purple : Ni, blue : Fe), (b) Staggered AB stacking of NiFe-Salphen-COF (Purple : Ni, blue : Fe).

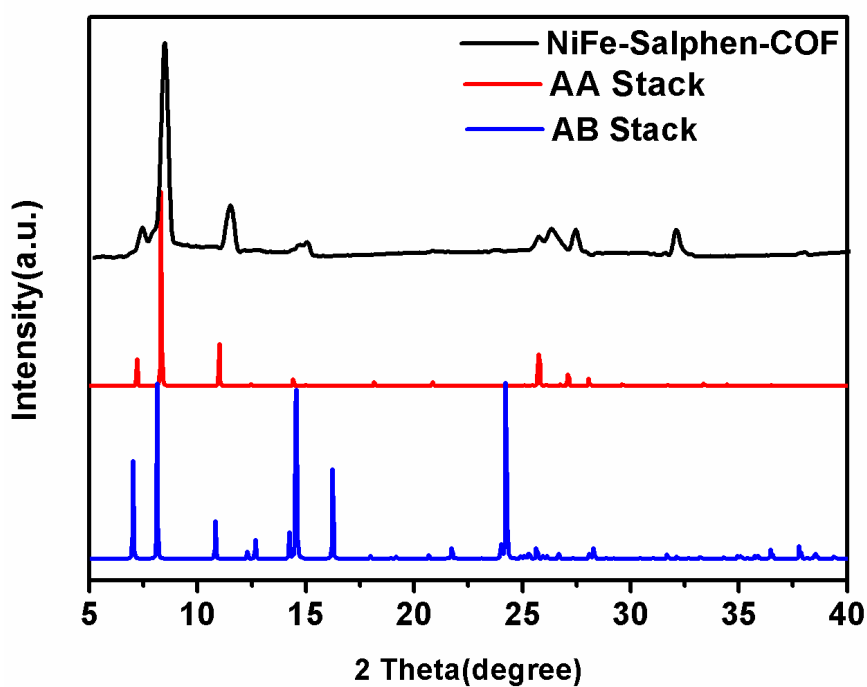

**Fig. S24** PXRD patterns of NiFe-Salphen-COF (eclipsed AA stacking and Staggered AB stacking).

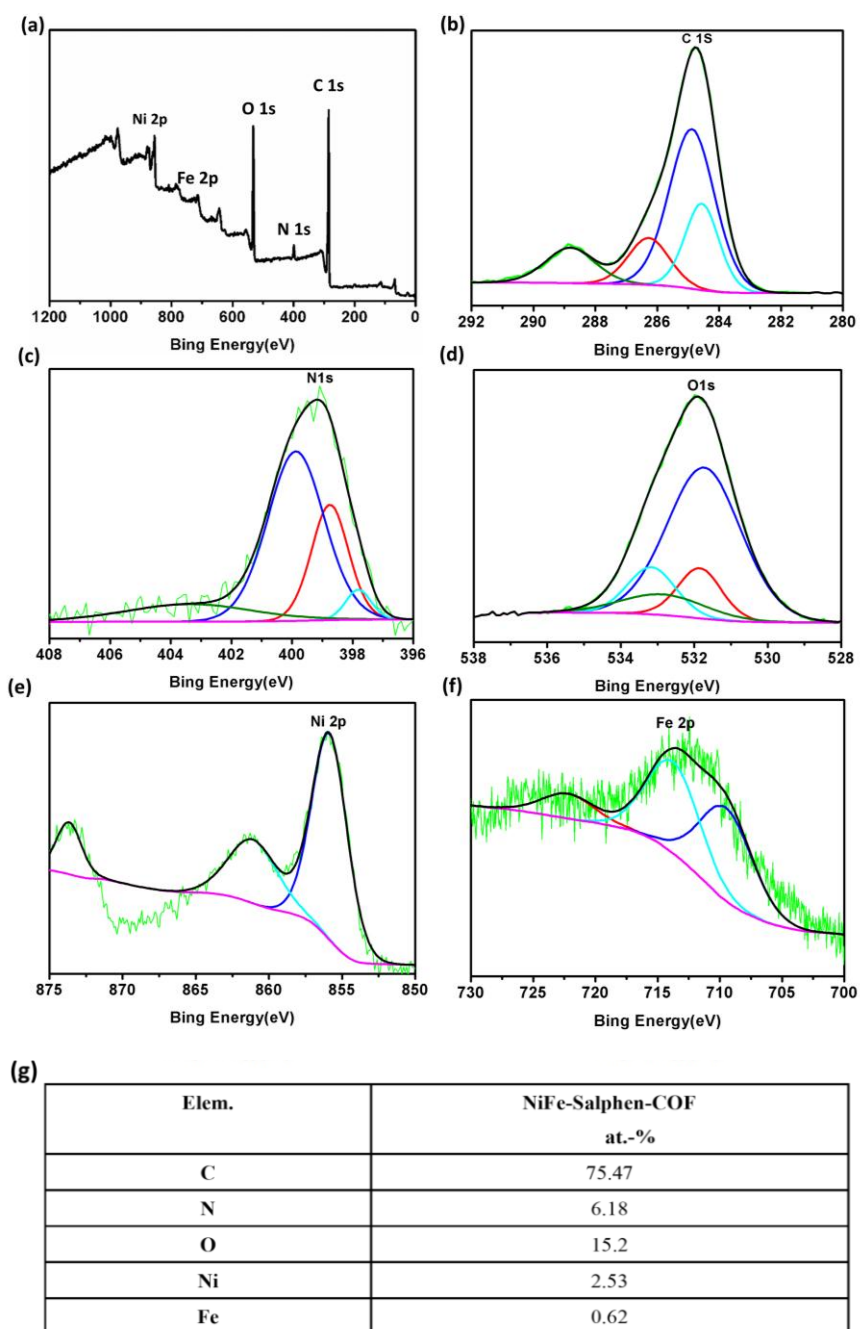

at.-%: atomic ratio in percentage.

**Fig. S25** (a) Survey, (b) C 1s, (c) N 1s, (d) O 1s, (e) Ni 2p and (f) Fe 2p spectra of **NiFe-Salphen-COF**. (g) The elemental composition according to the XPS analysis.

The XPS survey of **NiFe-Salphen-COF** confirms the presence of C, N, O, Fe and Ni. The signals at 399.5 and 532.1 eV correspond to N 1s and O 1s, respectively. The Ni 2p spectrum exhibits two main peaks around 856.1 and 874.1 eV that are assigned to Ni 2p<sub>3/2</sub> and Ni 2p<sub>1/2</sub>, respectively. The Fe 2p spectrum exhibits two main peaks around 713 and 722.5 eV that are assigned to Fe 2p<sub>3/2</sub> and Fe 2p<sub>1/2</sub>, respectively.

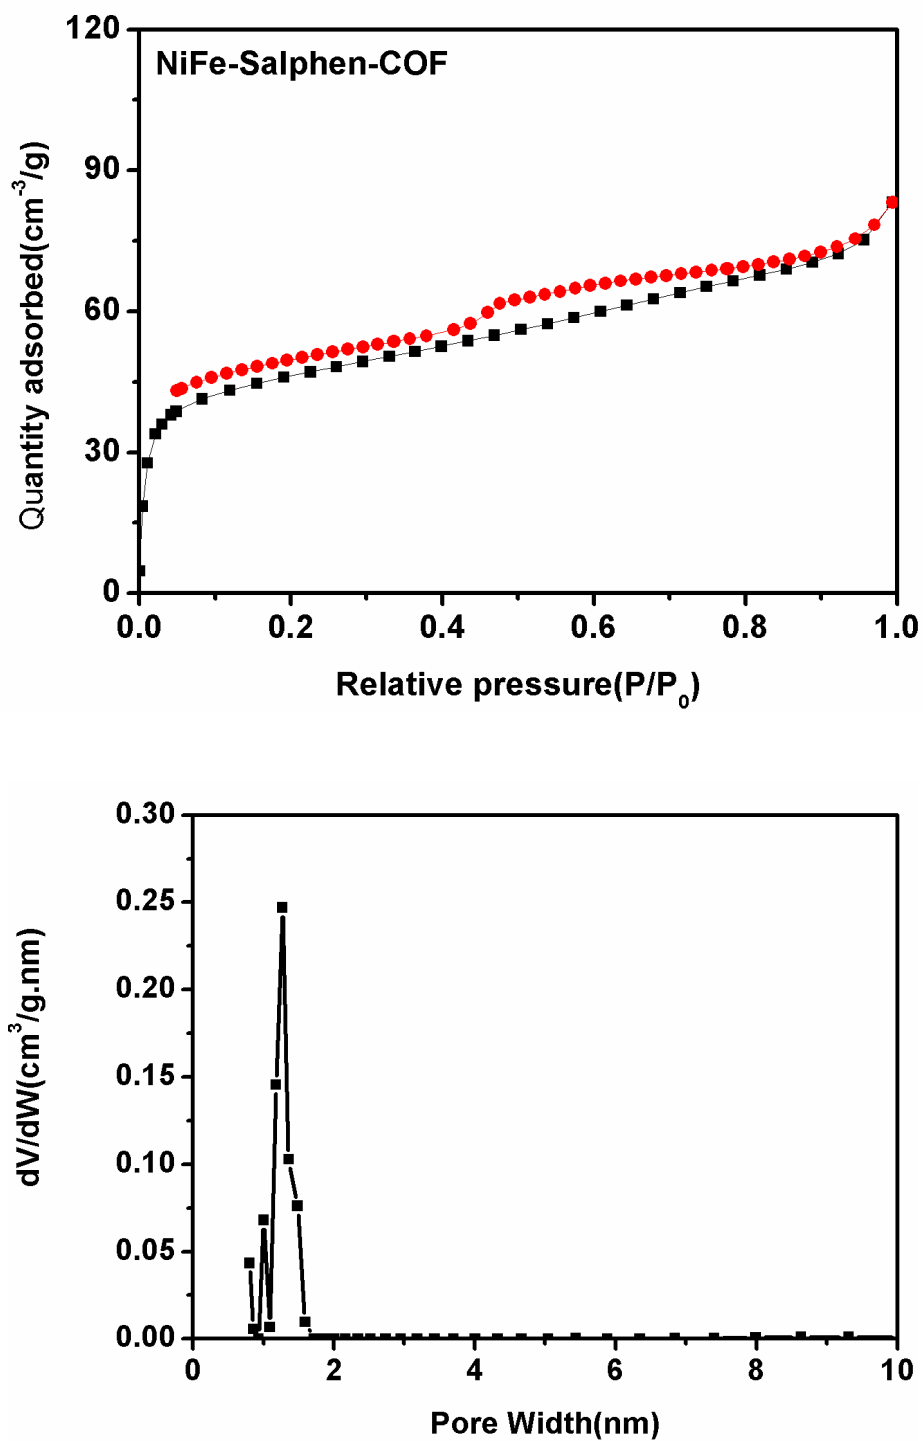

**Fig. S26**  $\text{N}_2$  adsorption/desorption isotherms of NiFe-Salphen-COF measured at 77.3 K. The BET surface area of NiFe-Salphen-COF was calculated to be  $92 \text{ m}^2 \text{ g}^{-1}$ .

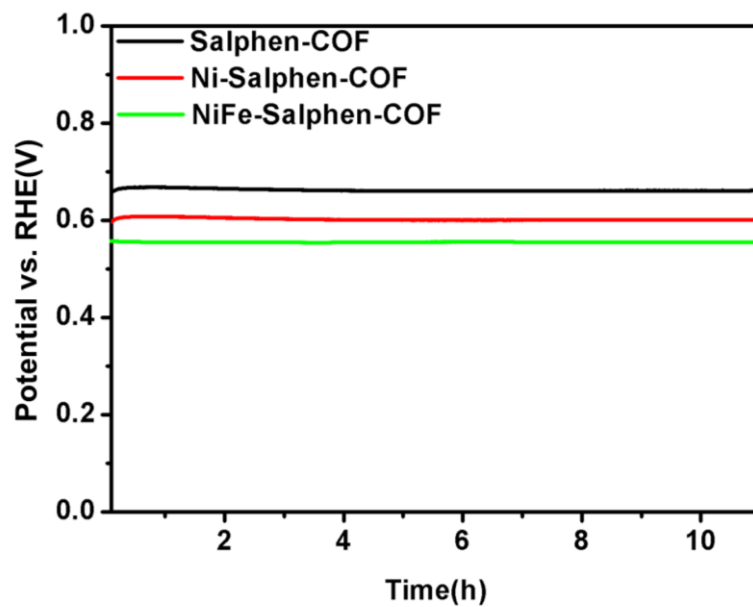

**Fig. S27** Long-term stability test of the **Salphen-COF**, **Ni-Salphen-COF**, **NiFe-Salphen-COF** electrodes at a constant current density of  $10 \text{ mA cm}^{-2}$ .

**Table S1** Fractional atomic coordinates for the unit cell of **Salphen-COF** with *P6* space group.

| <b>Salphen-COF</b>                                                                                                                                                                  |         |         |         |
|-------------------------------------------------------------------------------------------------------------------------------------------------------------------------------------|---------|---------|---------|
| <i>P6</i> space group<br>$a = 24.5864 \text{ \AA}$ $b = 24.5864 \text{ \AA}$ $c = 3.4590 \text{ \AA}$<br>$\alpha = 90.0000^\circ$ $\beta = 90.0000^\circ$ $\gamma = 120.0000^\circ$ |         |         |         |
| C1                                                                                                                                                                                  | 1.36454 | 1.03861 | 0.65904 |
| C2                                                                                                                                                                                  | 1.31597 | 1.06053 | 0.60161 |
| C3                                                                                                                                                                                  | 1.43326 | 1.09263 | 0.63798 |
| O4                                                                                                                                                                                  | 1.32459 | 1.10584 | 0.84444 |
| C5                                                                                                                                                                                  | 1.60216 | 1.32337 | 0.29077 |
| C6                                                                                                                                                                                  | 1.61264 | 1.26922 | 0.41221 |
| C7                                                                                                                                                                                  | 1.55777 | 1.20553 | 0.29254 |
| C8                                                                                                                                                                                  | 1.49584 | 1.19605 | 0.44206 |
| C9                                                                                                                                                                                  | 1.48358 | 1.24864 | 0.31948 |
| C10                                                                                                                                                                                 | 1.53891 | 1.31300 | 0.43034 |
| N11                                                                                                                                                                                 | 1.42474 | 1.23969 | 0.46627 |
| N12                                                                                                                                                                                 | 1.44364 | 1.13384 | 0.35005 |
| O13                                                                                                                                                                                 | 1.27860 | 1.17653 | 0.44146 |
| C14                                                                                                                                                                                 | 0.59577 | 0.72305 | 0.27137 |
| C15                                                                                                                                                                                 | 0.71135 | 0.76219 | 0.39468 |
| C16                                                                                                                                                                                 | 0.64250 | 0.71322 | 0.47979 |
| C17                                                                                                                                                                                 | 0.75700 | 0.75240 | 0.62044 |
| C18                                                                                                                                                                                 | 0.63148 | 0.64668 | 0.42160 |
| C19                                                                                                                                                                                 | 1.17480 | 1.20150 | 0.51836 |



**Table S2** Fractional atomic coordinates for the unit cell of **Ni-Salphen-COF** with *P6* space group.

| <b>Ni-Salphen-COF</b>                                                                                                                                                               |         |         |         |
|-------------------------------------------------------------------------------------------------------------------------------------------------------------------------------------|---------|---------|---------|
| <i>P6</i> space group<br>$a = 24.5864 \text{ \AA}$ $b = 24.5864 \text{ \AA}$ $c = 3.4590 \text{ \AA}$<br>$\alpha = 90.0000^\circ$ $\beta = 90.0000^\circ$ $\gamma = 120.0000^\circ$ |         |         |         |
| Ni1                                                                                                                                                                                 | 1.37734 | 1.18867 | 0.46813 |
| C2                                                                                                                                                                                  | 1.37140 | 1.05585 | 0.46813 |
| C3                                                                                                                                                                                  | 1.31508 | 1.05717 | 0.46813 |
| C4                                                                                                                                                                                  | 1.42955 | 1.10997 | 0.46813 |
| O5                                                                                                                                                                                  | 1.32374 | 1.11281 | 0.46813 |
| C6                                                                                                                                                                                  | 1.60925 | 1.33352 | 0.46813 |
| C7                                                                                                                                                                                  | 1.60925 | 1.27573 | 0.46813 |
| C8                                                                                                                                                                                  | 1.55161 | 1.21890 | 0.46813 |
| C9                                                                                                                                                                                  | 1.49516 | 1.21982 | 0.46813 |
| C10                                                                                                                                                                                 | 1.49516 | 1.27534 | 0.46813 |
| C11                                                                                                                                                                                 | 1.55161 | 1.33271 | 0.46813 |
| N12                                                                                                                                                                                 | 1.43744 | 1.26885 | 0.46813 |
| N13                                                                                                                                                                                 | 1.43744 | 1.16859 | 0.46813 |
| O14                                                                                                                                                                                 | 1.32374 | 1.21093 | 0.46813 |
| C15                                                                                                                                                                                 | 0.57045 | 0.68042 | 0.46813 |
| C16                                                                                                                                                                                 | 0.68492 | 0.74209 | 0.46813 |
| C17                                                                                                                                                                                 | 0.62860 | 0.68445 | 0.46813 |
| C18                                                                                                                                                                                 | 0.74358 | 0.74358 | 0.46813 |
| C19                                                                                                                                                                                 | 0.62868 | 0.62868 | 0.46813 |
| C20                                                                                                                                                                                 | 1.19585 | 1.19585 | 0.46813 |

**Table S3** Fractional atomic coordinates for the unit cell of **NiFe-Salphen-COF** with *P1* space group.

| <b>NiFe-Salphen-COF</b>                                                                                                                                                             |         |         |         |
|-------------------------------------------------------------------------------------------------------------------------------------------------------------------------------------|---------|---------|---------|
| <i>P1</i> space group<br>$a = 24.6048 \text{ \AA}$ $b = 24.6048 \text{ \AA}$ $c = 3.6468 \text{ \AA}$<br>$\alpha = 79.3514^\circ$ $\beta = 79.3514^\circ$ $\gamma = 119.6345^\circ$ |         |         |         |
| Ni1                                                                                                                                                                                 | 0.37719 | 0.18859 | 0.47166 |
| C2                                                                                                                                                                                  | 0.37142 | 0.05581 | 0.47166 |
| C3                                                                                                                                                                                  | 0.31506 | 0.05706 | 0.47166 |
| C4                                                                                                                                                                                  | 0.42954 | 0.10995 | 0.47166 |
| O5                                                                                                                                                                                  | 0.32355 | 0.11264 | 0.47166 |
| C6                                                                                                                                                                                  | 0.60923 | 0.33352 | 0.47166 |
| C7                                                                                                                                                                                  | 0.60923 | 0.27571 | 0.47166 |
| C8                                                                                                                                                                                  | 0.55157 | 0.21886 | 0.47166 |
| C9                                                                                                                                                                                  | 0.49510 | 0.21979 | 0.47166 |
| C10                                                                                                                                                                                 | 0.49510 | 0.27531 | 0.47166 |
| C11                                                                                                                                                                                 | 0.55157 | 0.33271 | 0.47166 |
| N12                                                                                                                                                                                 | 0.43736 | 0.26881 | 0.47166 |
| N13                                                                                                                                                                                 | 0.43736 | 0.16855 | 0.47166 |
| O14                                                                                                                                                                                 | 0.32355 | 0.21091 | 0.47166 |
| C15                                                                                                                                                                                 | 0.57046 | 0.68042 | 0.47166 |
| C16                                                                                                                                                                                 | 0.68494 | 0.74201 | 0.47166 |
| C17                                                                                                                                                                                 | 0.62858 | 0.68439 | 0.47166 |
| C18                                                                                                                                                                                 | 0.74362 | 0.74362 | 0.47166 |
| C19                                                                                                                                                                                 | 0.62860 | 0.62860 | 0.47166 |
| C20                                                                                                                                                                                 | 0.19809 | 0.19150 | 0.40103 |
| Ni21                                                                                                                                                                                | 0.81141 | 0.18859 | 0.47166 |
| C22                                                                                                                                                                                 | 0.94419 | 0.31561 | 0.47166 |
| C23                                                                                                                                                                                 | 0.94294 | 0.25799 | 0.47166 |
| C24                                                                                                                                                                                 | 0.89005 | 0.31958 | 0.47166 |

|      |         |         |         |
|------|---------|---------|---------|
| O25  | 0.88736 | 0.21091 | 0.47166 |
| C26  | 0.66648 | 0.27571 | 0.47166 |
| C27  | 0.72429 | 0.33352 | 0.47166 |
| C28  | 0.78114 | 0.33271 | 0.47166 |
| C29  | 0.78021 | 0.27531 | 0.47166 |
| C30  | 0.72469 | 0.21979 | 0.47166 |
| C31  | 0.66729 | 0.21886 | 0.47166 |
| N32  | 0.73119 | 0.16855 | 0.47166 |
| N33  | 0.83145 | 0.26881 | 0.47166 |
| O34  | 0.78909 | 0.11264 | 0.47166 |
| C35  | 0.31958 | 0.89005 | 0.47166 |
| C36  | 0.25799 | 0.94294 | 0.47166 |
| C37  | 0.31561 | 0.94419 | 0.47166 |
| C38  | 0.25638 | 0.00000 | 0.47166 |
| C39  | 0.37140 | 0.00000 | 0.47166 |
| C40  | 0.80850 | 0.00659 | 0.40103 |
| Fe41 | 0.81141 | 0.62281 | 0.47166 |
| C42  | 0.68439 | 0.62858 | 0.47166 |
| C43  | 0.74201 | 0.68494 | 0.47166 |
| C44  | 0.68042 | 0.57046 | 0.47166 |
| O45  | 0.78909 | 0.67645 | 0.47166 |
| C46  | 0.72429 | 0.39077 | 0.47166 |
| C47  | 0.66648 | 0.39077 | 0.47166 |
| C48  | 0.66729 | 0.44843 | 0.47166 |
| C49  | 0.72469 | 0.50490 | 0.47166 |
| C50  | 0.78021 | 0.50490 | 0.47166 |
| C51  | 0.78114 | 0.44843 | 0.47166 |
| N52  | 0.83145 | 0.56264 | 0.47166 |
| N53  | 0.73119 | 0.56264 | 0.47166 |

|      |         |         |         |
|------|---------|---------|---------|
| O54  | 0.88736 | 0.67645 | 0.47166 |
| C55  | 0.10995 | 0.42954 | 0.47166 |
| C56  | 0.05706 | 0.31506 | 0.47166 |
| C57  | 0.05581 | 0.37142 | 0.47166 |
| C58  | 0.00000 | 0.25638 | 0.47166 |
| C59  | 0.00000 | 0.37140 | 0.47166 |
| C60  | 0.99341 | 0.80191 | 0.40103 |
| Ni61 | 0.62281 | 0.81141 | 0.47166 |
| C62  | 0.62858 | 0.94419 | 0.47166 |
| C63  | 0.68494 | 0.94294 | 0.47166 |
| C64  | 0.57046 | 0.89005 | 0.47166 |
| O65  | 0.67645 | 0.88736 | 0.47166 |
| C66  | 0.39077 | 0.66648 | 0.47166 |
| C67  | 0.39077 | 0.72429 | 0.47166 |
| C68  | 0.44843 | 0.78114 | 0.47166 |
| C69  | 0.50490 | 0.78021 | 0.47166 |
| C70  | 0.50490 | 0.72469 | 0.47166 |
| C71  | 0.44843 | 0.66729 | 0.47166 |
| N72  | 0.56264 | 0.73119 | 0.47166 |
| N73  | 0.56264 | 0.83145 | 0.47166 |
| O74  | 0.67645 | 0.78909 | 0.47166 |
| C75  | 0.42954 | 0.31958 | 0.47166 |
| C76  | 0.31506 | 0.25799 | 0.47166 |
| C77  | 0.37142 | 0.31561 | 0.47166 |
| C78  | 0.25638 | 0.25638 | 0.47166 |
| C79  | 0.37140 | 0.37140 | 0.47166 |
| C80  | 0.80191 | 0.80850 | 0.40103 |
| Ni81 | 0.18859 | 0.81141 | 0.47166 |
| C82  | 0.05581 | 0.68439 | 0.47166 |

|       |         |         |         |
|-------|---------|---------|---------|
| C83   | 0.05706 | 0.74201 | 0.47166 |
| C84   | 0.10995 | 0.68042 | 0.47166 |
| O85   | 0.11264 | 0.78909 | 0.47166 |
| C86   | 0.33352 | 0.72429 | 0.47166 |
| C87   | 0.27571 | 0.66648 | 0.47166 |
| C88   | 0.21886 | 0.66729 | 0.47166 |
| C89   | 0.21979 | 0.72469 | 0.47166 |
| C90   | 0.27531 | 0.78021 | 0.47166 |
| C91   | 0.33271 | 0.78114 | 0.47166 |
| N92   | 0.26881 | 0.83145 | 0.47166 |
| N93   | 0.16855 | 0.73119 | 0.47166 |
| O94   | 0.21091 | 0.88736 | 0.47166 |
| C95   | 0.68042 | 0.10995 | 0.47166 |
| C96   | 0.74201 | 0.05706 | 0.47166 |
| C97   | 0.68439 | 0.05581 | 0.47166 |
| C98   | 0.74362 | 0.00000 | 0.47166 |
| C99   | 0.62860 | 0.00000 | 0.47166 |
| C100  | 0.19150 | 0.99341 | 0.40103 |
| Ni101 | 0.18859 | 0.37719 | 0.47166 |
| C102  | 0.31561 | 0.37142 | 0.47166 |
| C103  | 0.25799 | 0.31506 | 0.47166 |
| C104  | 0.31958 | 0.42954 | 0.47166 |
| O105  | 0.21091 | 0.32355 | 0.47166 |
| C106  | 0.27571 | 0.60923 | 0.47166 |
| C107  | 0.33352 | 0.60923 | 0.47166 |
| C108  | 0.33271 | 0.55157 | 0.47166 |
| C109  | 0.27531 | 0.49510 | 0.47166 |
| C110  | 0.21979 | 0.49510 | 0.47166 |
| C111  | 0.21886 | 0.55157 | 0.47166 |

|      |         |         |         |
|------|---------|---------|---------|
| N112 | 0.16855 | 0.43736 | 0.47166 |
| N113 | 0.26881 | 0.43736 | 0.47166 |
| O114 | 0.11264 | 0.32355 | 0.47166 |
| C115 | 0.89005 | 0.57046 | 0.47166 |
| C116 | 0.94294 | 0.68494 | 0.47166 |
| C117 | 0.94419 | 0.62858 | 0.47166 |
| C118 | 0.00000 | 0.74362 | 0.47166 |
| C119 | 0.00000 | 0.62860 | 0.47166 |
| C120 | 0.00659 | 0.19809 | 0.40103 |

**Table S4** The water oxidation parameters of various porous organic polymers electrocatalysts.

| <b>POPs</b>                   | <b>Catalysts</b>                                         | <b>Tafel slope<br/>(mV dec<sup>-1</sup>)</b> | <b><math>\eta_{10}</math><br/>(mV)</b> | <b>Ref.</b> |
|-------------------------------|----------------------------------------------------------|----------------------------------------------|----------------------------------------|-------------|
| <b>COFs</b>                   | Salphen-COF                                              | 138                                          | 354                                    | This work   |
|                               | Ni-Salphen-COF                                           | 72                                           | 284                                    | This work   |
|                               | NiFe-Salphen-COF                                         | 53                                           | 266                                    | This work   |
|                               | Co-TpBpy                                                 | 59                                           | 510                                    | 1           |
|                               | macro-TpBpy-Co                                           | 54                                           | 380                                    | 2           |
|                               | Co-PDY                                                   | 99                                           | 270                                    | 3           |
|                               | (CoP) <sub>n</sub> -MWCNTs                               | 56                                           | 290                                    | 4           |
|                               | CoNP-PTCOF                                               | 233                                          | 450                                    | 5           |
|                               | PTCOF                                                    | 290                                          | 600                                    | 5           |
|                               | EPOP-700                                                 | 76                                           | 297                                    | 6           |
|                               | Ni <sub>0.5</sub> Fe <sub>0.5</sub> @COF-SO <sub>3</sub> | 83                                           | 308                                    | 7           |
|                               | Co <sub>0.5</sub> V <sub>0.5</sub> @COF-SO <sub>3</sub>  | 62                                           | 300                                    | 8           |
|                               | COF-C <sub>4</sub> N                                     | 64                                           | 349                                    | 9           |
|                               | C <sub>4</sub> -SHZ-COF                                  | 39                                           | 320                                    | 10          |
|                               | FeNi-CoP-800                                             | 79                                           | 330                                    | 11          |
|                               | PSN <sub>0.4</sub> -CoNi/CNT-800                         | 68                                           | 270                                    | 12          |
|                               | CCoPTDP-FeNi-SiO <sub>2</sub>                            | 57                                           | 310                                    | 13          |
| IISERP-COF3-Ni <sub>3</sub> N | 79                                                       | 230                                          | 14                                     |             |
| <b>CMPs</b>                   | Co-POP                                                   | 87                                           | 610                                    | 15          |
|                               | Salen-CMP-Fe-1                                           | 93                                           | 318                                    | 16          |
|                               | salen-CMP-Co-1                                           | 118                                          | 369                                    | 16          |
|                               | Salen-CMP-Fe-2                                           | 80                                           | 267                                    | 16          |
| <b>MOFs</b>                   | NNU-23                                                   | 81.8                                         | 365                                    | 17          |
|                               | CTGU-10c                                                 | 58                                           | 240                                    | 18          |
|                               | MAF-X27-OH                                               | 60                                           | 292                                    | 19          |

## References

- [1] H. B. Aiyappa, J. Thote, D. B. Shinde, R. Banerjee, S. Kurungot, *Chem. Mater.*, 2016, **28**, 4375-4379.
- [2] X. Zhao, P. Pachfule, S. Li, T. Langenhahn, M. Ye, C. Schlesiger, S. Praetz, J. Schmidt, A. Thomas, *J. Am. Chem. Soc.*, 2019, **141**, 6623-6630.
- [3] H. Huang, F. M. Li, Y. Zhang and Y. Chen, *J. Mater. Chem. A*, 2019, **7**, 5575-5582.
- [4] H. X. Jia, Z. J. Sun, D. C. Jiang and P. W. Du, *Chem. Mater.*, 2015, **27**, 4586-4593.
- [5] J. H. Park, C. H. Lee, J. M. Ju, J. H. Lee, J. Seol, S. U. Lee and J. H. Kim, *Adv. Funct. Mater.*, 2021, **31**, 2101727.
- [6] S. Gopi, K. Giribabu, M. Kathiresan, *ACS Omega.*, 2018, **3**, 6251-6258.
- [7] Z. Gao, L. L. Gong, X. Q. He, X. M. Su, L. H. Xiao, F. Luo, *Inorg. Chem.*, 2020, **59**, 4995-5003.
- [8] Z. Gao, Z. Yu, Y. Huang, X. He, X. Su, L. Xiao, Y. I. Yu, X. Huang, F. Luo, *J. Mater. Chem. A*, 2020, **8**, 5907-5912.
- [9] C. Yang, Z. D. Yang, H. Dong, N. Sun, Y. Lu, F. M. Zhang, G. Zhang, *ACS Energy Lett.*, 2019, **4**, 2251-2258.
- [10] S. Mondal, B. Mohanty, M. Nurhuda, S. Dalapati, R. Jana, M. Addicoat, A. Datta, B. K. Jena, A. Bhaumik, *ACS Catal.*, 2020, **10**, 5623-5630.
- [11] Z. Liao, Y. Wang, Q. Wang, Y. Cheng, Z. Xiang, *Appl. Catal. B*, 2019, **243**, 204-211.
- [12] D. D. Ma, C. Cao, X. Li, J. T. Cheng, L. L. Zhou, X. T. Wu, Q. L. Zhu, *Electrochim. Acta*, 2019, **321**, 134679.
- [13] J. Guo, T. Li, Q. Wang, N. Zhang, Y. Cheng, Z. Xiang, *Nanoscale*, 2019, **11**, 211-218.
- [14] G. Xu, H. Lei, G. Zhou, C. Zhang, L. Xie, W. Zhang, R. Cao, *Chem. Commun.*, 2019, **55**, 12647-12650.
- [15] A. Singh, S. Roy, C. Das, D. Samanta, T. K. Maji, *Chem. Commun.*, 2018, **54**, 4465-4468.
- [16] W. Zhou, L. Yang, F. Y. Zhou, Q. W. Deng, X. Wang, D. Zhai, G. Q. Ren, K. L. Han, W. Q. Deng and L. Sun. *Chem. Eur. J*, 2020, **26**, 7720-7726.
- [17] X. L. Wang, L. Z. Dong, M. Qiao, Y. J. Tang, J. Liu, Y. F. Li, S. L. Li, J. X. Su, Y. Q. Lan. *Angew. Chem. Int. Ed.*, 2018, **57**, 9660-9664.
- [18] W. Zhou, D. D. Huang, Y. P. Wu, J. Zhao, T. Wu, J. Zhang, D. S. Li, C. H. Sun, P. Y. Feng, X. H. Bu, *Angew. Chem. Int. Ed.*, 2019, **58**, 4227-4231.
- [19] X. F. Lu, P. Q. Liao, J. W. Wang, J. X. Wu, X. W. Chen, C. T. He, J. P. Zhang, G. R. Li, X. M. Chen, *J. Am. Chem. Soc.*, 2016, **138**, 8336-8339.
